# Supplementary material for: A universal co-solvent dilution strategy enables facile and cost-effective fabrication of perovskite photovoltaics
Source: PubMed Central journal article supplement (PMC8748698; doi:10.1038/s41467-021-27740-4), 2022-01-10
Supplement: 41467_2021_27740_MOESM2_ESM.pdf [file 41467_2021_27740_MOESM2_ESM.pdf]

**Title:** Supplementary Movie 1.

**Description:** The wetting behavior of control (C-1.4 M) triple-cation perovskite solution (30  $\mu$ L solution was dropped on a FTO/c-TiO<sub>2</sub> substrate with a size of 2.5 cm x 1.7 cm).

**Title:** Supplementary Movie 2.

**Description:** The wetting behavior of THF-diluted (T0.47 M) triple-cation perovskite solution (30  $\mu$ L solution was dropped on a FTO/c-TiO<sub>2</sub> substrate with a size of 2.5 cm x 1.7 cm).
